# Supplementary material for: Hydrogen bonding of helical vinyl polymers containing alanine moieties: a stabilized interaction of helical conformation sensitive to solvents and pH
Source: Royal Society of Chemistry journal article supplement (doi:10.1039/c2py00492e), 2012-01-01
Supplement: c2py00492e.pdf [file c2py00492e.pdf]

## Supporting Information

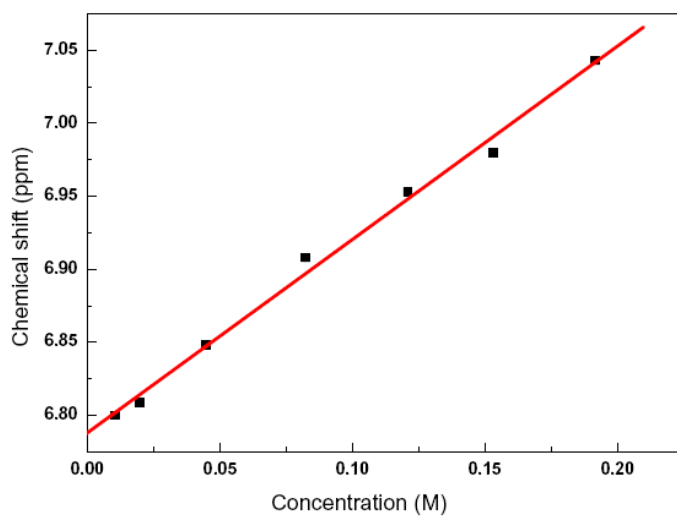

**Figure S1** Concentration dependence of the chemical shift of the resonance peak of the amide proton of **St-(L)-M** (in  $\text{CDCl}_3$ ) as a function of concentration.

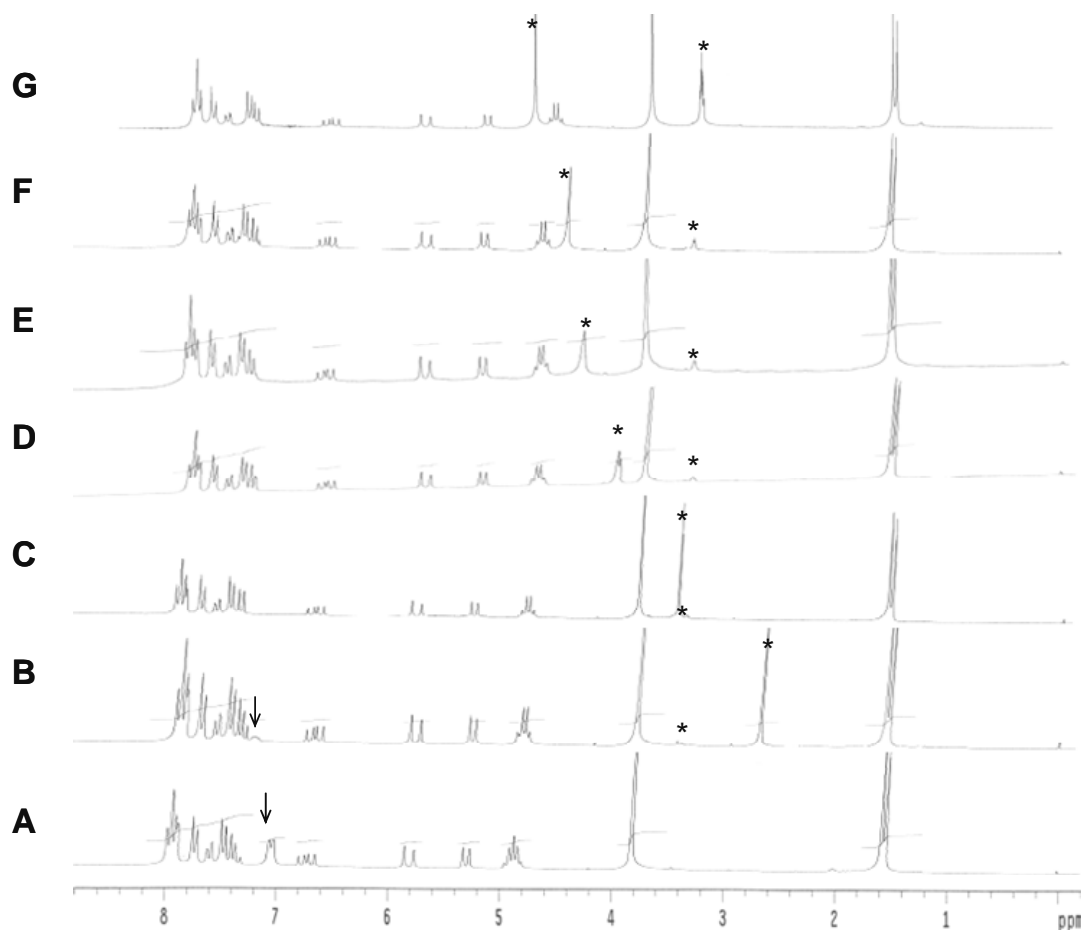

**Figure S2** <sup>1</sup>H-NMR spectra of methanol-*d*<sub>4</sub>/chloroform-*d* solutions of monomer **St-(L)-M** (50mg/mL) with varying ratios of methanol-*d*<sub>4</sub> (vol%): (A), 0, (B), 5, (C), 10, (D), 20, (E), 30, (F), 40, (G), 100. The resonance peaks of the amide proton (CONH) are marked with downward arrows(↓), while those of the solvent are marked with asterisks (\*)

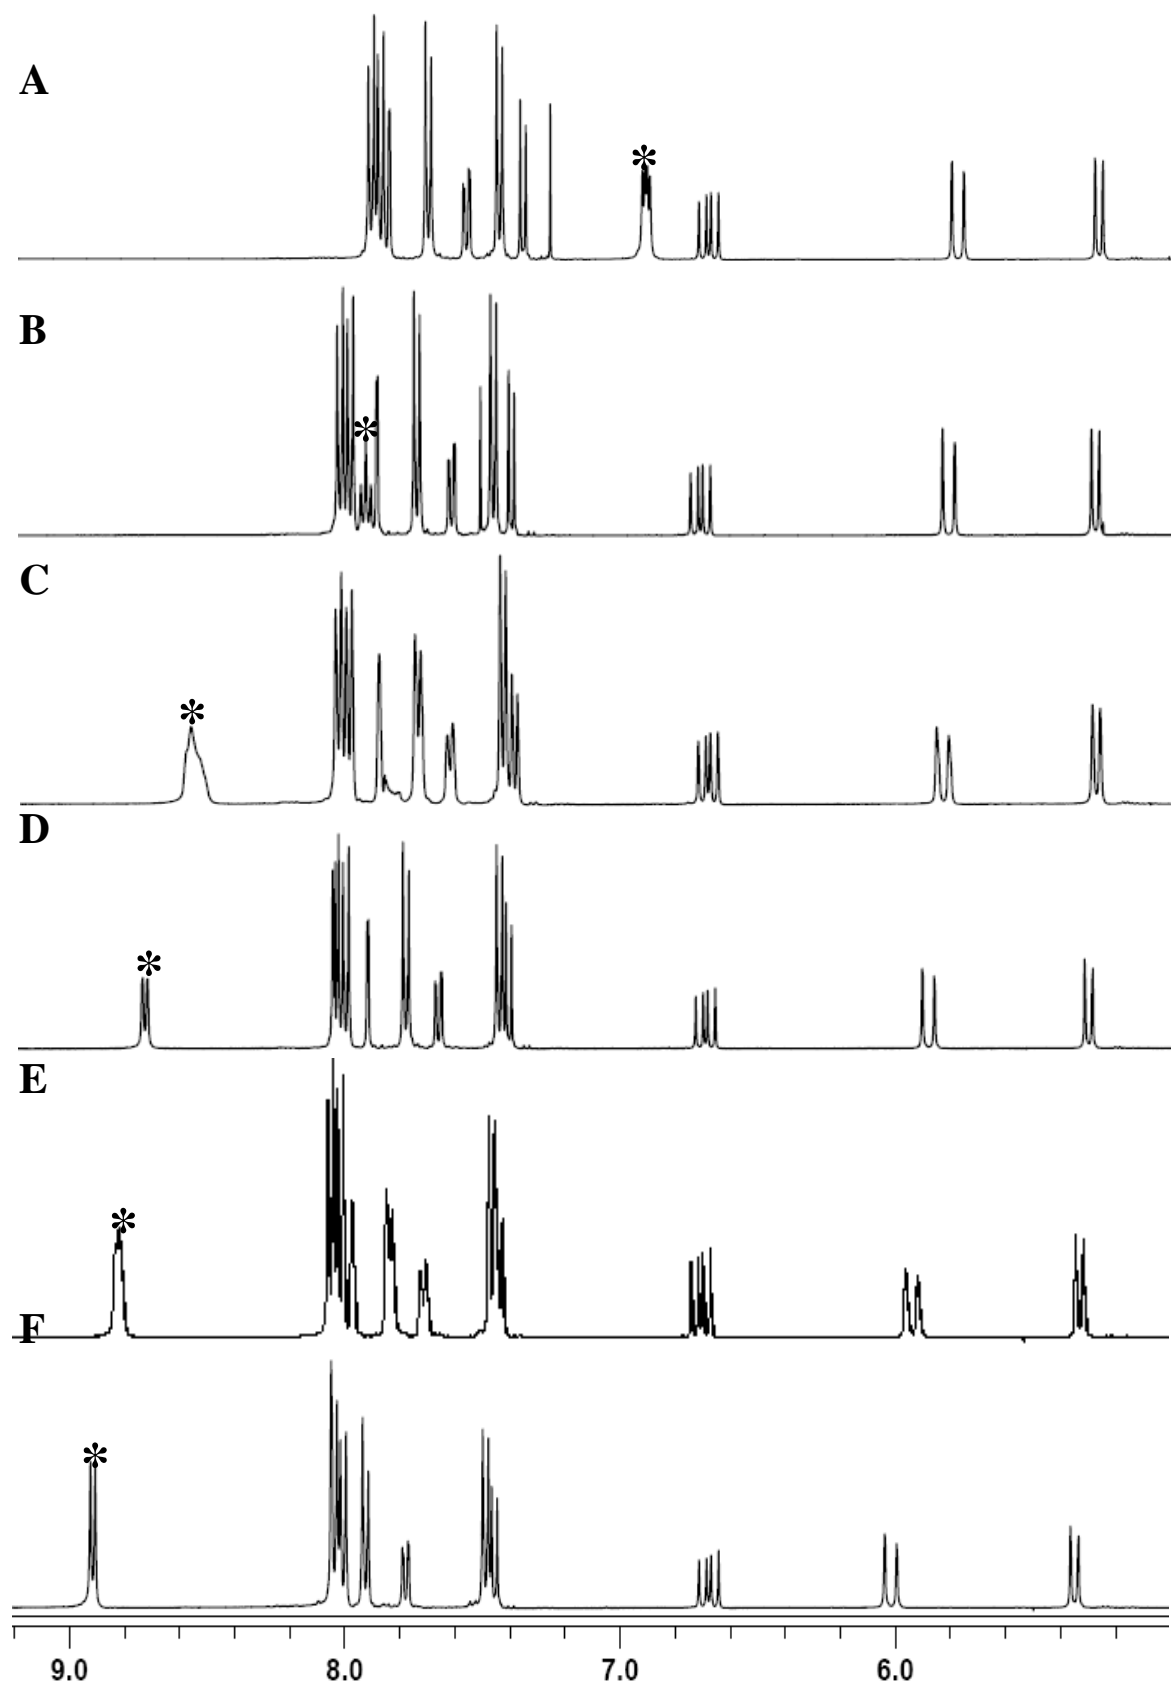

**Figure S3**  $^1\text{H}$  NMR spectra of DMSO-*d*<sub>6</sub>/chloroform-*d* solutions of **St-(L)-M** (50 mg/mL) with varying ratios of DMSO-*d*<sub>6</sub> (vol %): (A) 0, (B) 15, (C) 30, (D) 50, (E) 70, and (E) 100. The resonance peaks of the amide (HNCO) protons are respectively marked with asterisks (\*)

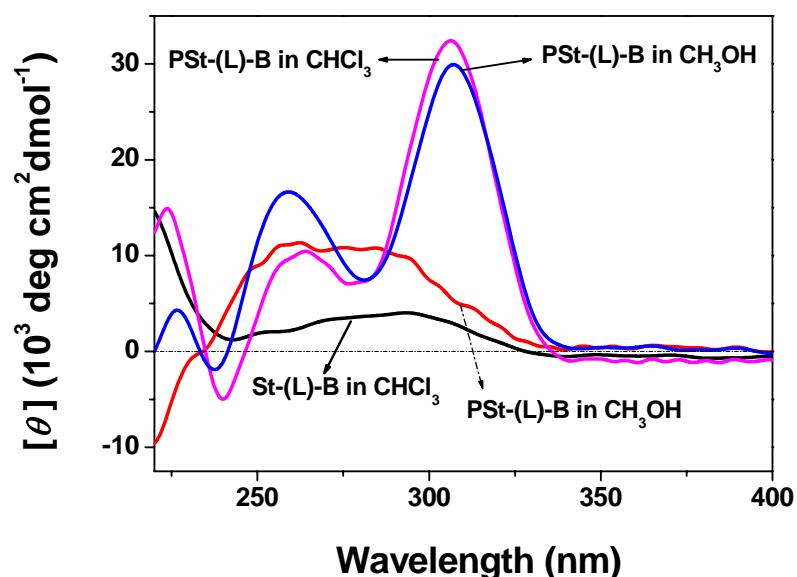

**Figure S4** CD spectra of **St-(L)-B** and **PSt-(L)-B** in methanol or chloroform at 25 °C with a concentration of  $2.0 \times 10^{-5}$  mol/L.

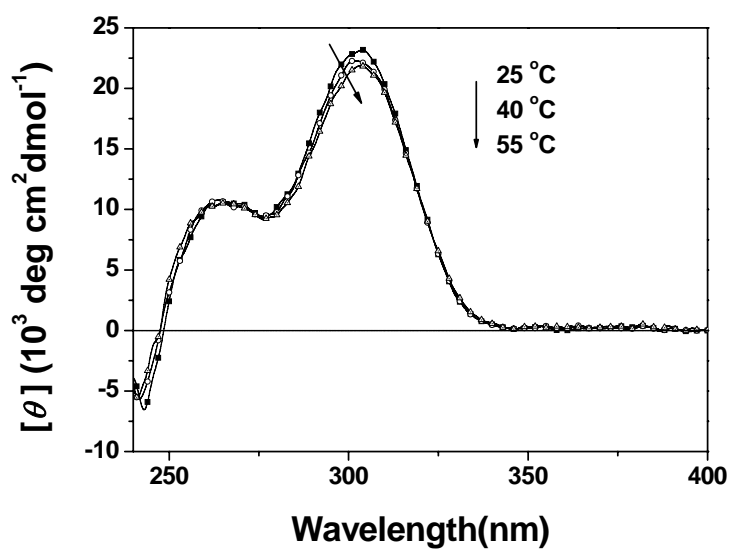

**Figure S5** Temperature dependence of CD spectra of **PSt-(L)-M** in chloroform solution at a concentration of  $2. \times 10^{-5}$  mM
